# Supplementary material for: Acid Sphingomyelinase Serum Activity Predicts Mortality in Intensive Care Unit Patients after Systemic Inflammation: A Prospective Cohort Study
Source: PubMed Central journal article supplement (PMC4226549; doi:10.1371/journal.pone.0112323), 2014-11-10
Supplement: pone.0112323.s001.pdf [file pone.0112323.s001.pdf]

Variables (ICU group)

Table S1: PCT (ng/ml)

|  | All              |                |               | Survivors        |                |               | Non-survivors    |                |               |
|--|------------------|----------------|---------------|------------------|----------------|---------------|------------------|----------------|---------------|
|  | <i>PCTbefore</i> | <i>PCTpeak</i> | <i>PCTlow</i> | <i>PCTbefore</i> | <i>PCTpeak</i> | <i>PCTlow</i> | <i>PCTbefore</i> | <i>PCTpeak</i> | <i>PCTlow</i> |
|  | 0,5              | 3,49           | 1,04          | 0,37             | 2,03           | 0,45          | 0,5              | 3,49           | 1,04          |
|  | 0,79             | 28,31          | 0,69          | 2,59             | 7,84           | 1,41          | 0,79             | 28,31          | 0,69          |
|  | 0,46             | 4,46           | 1,1           | n/a              | 17,58          | 5,02          | 0,46             | 4,46           | 1,1           |
|  | 4,95             | 10,1           | 3,6           | 0,09             | 2,61           | 0,13          | 4,95             | 10,1           | 3,6           |
|  | 2,08             | 4,4            | 1,17          | 0,21             | 2,11           | 0,49          | 2,08             | 4,4            | 1,17          |
|  | 4,88             | 12,28          | 0,46          | 0,41             | 3,09           | 0,42          | 4,88             | 12,28          | 0,46          |
|  | 0,31             | 4,58           | 0,49          | 0,29             | 5,18           | 0,45          | 0,31             | 4,58           | 0,49          |
|  | 0,28             | 2,29           | 0,38          | 0,17             | 2,52           | 0,39          | 0,28             | 2,29           | 0,38          |
|  | 0,46             | 2,98           | 0,38          | 2,34             | 32,99          | 0,44          | 0,46             | 2,98           | 0,38          |
|  | 1,01             | 2,22           | 0,48          | 0,37             | 100,55         | 0,48          | 1,01             | 2,22           | 0,48          |
|  | 0,37             | 2,03           | 0,45          |                  |                |               |                  |                |               |
|  | 2,59             | 7,84           | 1,41          |                  |                |               |                  |                |               |
|  | n/a              | 17,58          | 5,02          |                  |                |               |                  |                |               |
|  | 0,09             | 2,61           | 0,13          |                  |                |               |                  |                |               |
|  | 0,21             | 2,11           | 0,49          |                  |                |               |                  |                |               |
|  | 0,41             | 3,09           | 0,42          |                  |                |               |                  |                |               |
|  | 0,29             | 5,18           | 0,45          |                  |                |               |                  |                |               |
|  | 0,17             | 2,52           | 0,39          |                  |                |               |                  |                |               |
|  | 2,34             | 32,99          | 0,44          |                  |                |               |                  |                |               |
|  | 0,37             | 100,55         | 0,48          |                  |                |               |                  |                |               |

Variables (ICU group)

Table S2: ASM (pMol/ml\*h)

| All              |                |               | Survivors        |                |               | Non-survivors    |                |               |
|------------------|----------------|---------------|------------------|----------------|---------------|------------------|----------------|---------------|
| <i>PCTbefore</i> | <i>PCTpeak</i> | <i>PCTlow</i> | <i>PCTbefore</i> | <i>PCTpeak</i> | <i>PCTlow</i> | <i>PCTbefore</i> | <i>PCTpeak</i> | <i>PCTlow</i> |
| 4367,78          | 5827,1         | 4335,739      | 1833,288         | 1547,865       | 1373,608      | 4367,78          | 5827,1         | 4335,739      |
| 2373,48          | 1911,83        | 2257,718      | 3041,235         | 2531,009       | 2185,329      | 2373,48          | 1911,83        | 2257,718      |
| 1792,816         | 1835,107       | 2290          | n/a              | 3646,628       | 2715,091      | 1792,816         | 1835,107       | 2290          |
| 1990,827         | 2012,268       | 2167,391      | 3158,239         | 4571,43        | 2227,68       | 1990,827         | 2012,268       | 2167,391      |
| 5569,206         | 3443,251       | 2263,291      | 712,98           | 1906,784       | 1653,654      | 5569,206         | 3443,251       | 2263,291      |
| 2685,223         | 4330,894       | 2028,427      | 1836,618         | 1967,895       | 1422,425      | 2685,223         | 4330,894       | 2028,427      |
| 2966,605         | 4266,724       | 2932,136      | 2776,618         | 3520,356       | 2830,219      | 2966,605         | 4266,724       | 2932,136      |
| 3902,545         | 4886,777       | 4600,802      | 4927,735         | 1967,895       | 2422,425      | 3902,545         | 4886,777       | 4600,802      |
| 2781,508         | 3022,826       | 3465,657      | 3329,174         | 2470,006       | 1975,337      | 2781,508         | 3022,826       | 3465,657      |
| 5010,425         | 6833,413       | 4751,255      | 2307,531         | 4581,62        | 2224,006      | 5010,425         | 6833,413       | 4751,255      |
| 1833,288         | 1547,865       | 1373,608      |                  |                |               |                  |                |               |
| 3041,235         | 2531,009       | 2185,329      |                  |                |               |                  |                |               |
| n/a              | 3646,628       | 2715,091      |                  |                |               |                  |                |               |
| 3158,239         | 4571,43        | 2227,68       |                  |                |               |                  |                |               |
| 712,98           | 1906,784       | 1653,654      |                  |                |               |                  |                |               |
| 1836,618         | 1967,895       | 1422,425      |                  |                |               |                  |                |               |
| 2776,618         | 3520,356       | 2830,219      |                  |                |               |                  |                |               |
| 4927,735         | 1967,895       | 2422,425      |                  |                |               |                  |                |               |
| 3329,174         | 2470,006       | 1975,337      |                  |                |               |                  |                |               |
| 2307,531         | 4581,62        | 2224,006      |                  |                |               |                  |                |               |

Variables (ICU group)

Table S3: CRP (mg/l)

| All              |                |               | Survivors        |                |               | Non-survivors    |                |               |
|------------------|----------------|---------------|------------------|----------------|---------------|------------------|----------------|---------------|
| <i>PCTbefore</i> | <i>PCTpeak</i> | <i>PCTlow</i> | <i>PCTbefore</i> | <i>PCTpeak</i> | <i>PCTlow</i> | <i>PCTbefore</i> | <i>PCTpeak</i> | <i>PCTlow</i> |
| n/a              | 306,9          | 276,6         | 17,9             | 32,5           | 52,4          | n/a              | 306,9          | 276,6         |
| n/a              | 88,2           | 151,5         | 298,8            | 104            | 200,5         | n/a              | 88,2           | 151,5         |
| 68               | 264            | 69,5          | 107              | 92,3           | 76            | 68               | 264            | 69,5          |
| 316,9            | 301,2          | 241,2         | 218,9            | 234,3          | 63,6          | 316,9            | 301,2          | 241,2         |
| 221,2            | 203,6          | 203,6         | 2,7              | 31,6           | 79,2          | 221,2            | 203,6          | 203,6         |
| 127,2            | 83,7           | 78,2          | 133,5            | 215,6          | 58,7          | 127,2            | 83,7           | 78,2          |
| 128              | 159,4          | 123           | 181,7            | 117,5          | 117,2         | 128              | 159,4          | 123           |
| 61               | 118            | 78,2          | 202,2            | 245            | 286,5         | 61               | 118            | 78,2          |
| 115,1            | 118,4          | 130,7         | 93,5             | 130,9          | 64,9          | 115,1            | 118,4          | 130,7         |
| 237              | 292,2          | 223,4         | 207,2            | 260            | 16,2          | 237              | 292,2          | 223,4         |
| 17,9             | 32,5           | 52,4          |                  |                |               |                  |                |               |
| 298,8            | 104            | 200,5         |                  |                |               |                  |                |               |
| 107              | 92,3           | 76            |                  |                |               |                  |                |               |
| 218,9            | 234,3          | 63,6          |                  |                |               |                  |                |               |
| 2,7              | 31,6           | 79,2          |                  |                |               |                  |                |               |
| 133,5            | 215,6          | 58,7          |                  |                |               |                  |                |               |
| 181,7            | 117,5          | 117,2         |                  |                |               |                  |                |               |
| 202,2            | 245            | 286,5         |                  |                |               |                  |                |               |
| 93,5             | 130,9          | 64,9          |                  |                |               |                  |                |               |
| 207,2            | 260            | 16,2          |                  |                |               |                  |                |               |

Variables (ICU group)

Tabel S4: Lactate (mMol/l)

| All              |                |               | Survivors        |                |               | Non-survivors    |                |               |
|------------------|----------------|---------------|------------------|----------------|---------------|------------------|----------------|---------------|
| <i>PCTbefore</i> | <i>PCTpeak</i> | <i>PCTlow</i> | <i>PCTbefore</i> | <i>PCTpeak</i> | <i>PCTlow</i> | <i>PCTbefore</i> | <i>PCTpeak</i> | <i>PCTlow</i> |
| 4,9              | 3,5            | 2,3           | 0,7              | 0,4            | 0,5           | 4,9              | 3,5            | 2,3           |
| 6,7              | 5,5            | 1             | 9,1              | 3,2            | 1,2           | 6,7              | 5,5            | 1             |
| 1,4              | 1              | 1,4           | 1,6              | 1,2            | 0,6           | 1,4              | 1              | 1,4           |
| 2,2              | 1,9            | 2,4           | 0,9              | 0,9            | 1,9           | 2,2              | 1,9            | 2,4           |
| 1,1              | 1              | 1             | 4,1              | 3,2            | 1,1           | 1,1              | 1              | 1             |
| 1,3              | 1,1            | 0,9           | 2                | 1,7            | 1             | 1,3              | 1,1            | 0,9           |
| 0,8              | 1              | 1,2           | 1,6              | 1,1            | 1,6           | 0,8              | 1              | 1,2           |
| 2,5              | 1,6            | 0,9           | 1,2              | 1,5            | 1,6           | 2,5              | 1,6            | 0,9           |
| 4,4              | 5,1            | 2,4           | 0,9              | 1,3            | 0,9           | 4,4              | 5,1            | 2,4           |
| 1,4              | 2,27           | 0,8           | 2,7              | 3,8            | 1             | 1,4              | 2,27           | 0,8           |
| 0,7              | 0,4            | 0,5           |                  |                |               |                  |                |               |
| 9,1              | 3,2            | 1,2           |                  |                |               |                  |                |               |
| 1,6              | 1,2            | 0,6           |                  |                |               |                  |                |               |
| 0,9              | 0,9            | 1,9           |                  |                |               |                  |                |               |
| 4,1              | 3,2            | 1,1           |                  |                |               |                  |                |               |
| 2                | 1,7            | 1             |                  |                |               |                  |                |               |
| 1,6              | 1,1            | 1,6           |                  |                |               |                  |                |               |
| 1,2              | 1,5            | 1,6           |                  |                |               |                  |                |               |
| 0,9              | 1,3            | 0,9           |                  |                |               |                  |                |               |
| 2,7              | 3,8            | 1             |                  |                |               |                  |                |               |

Variables (ICU group)

Table S5: mSOFA (points)

|  | All              |                |               | Survivors        |                |               | Non-survivors    |                |               |
|--|------------------|----------------|---------------|------------------|----------------|---------------|------------------|----------------|---------------|
|  | <i>PCTbefore</i> | <i>PCTpeak</i> | <i>PCTlow</i> | <i>PCTbefore</i> | <i>PCTpeak</i> | <i>PCTlow</i> | <i>PCTbefore</i> | <i>PCTpeak</i> | <i>PCTlow</i> |
|  | 4                | 6              | 3             | 9                | 9              | 5             | 4                | 6              | 3             |
|  | 10               | 10             | 3             | 12               | 13             | 7             | 10               | 10             | 3             |
|  | 8                | 8              | 0             | 6                | 8              | 4             | 8                | 8              | 0             |
|  | 6                | 3              | 3             | 7                | 8              | 0             | 6                | 3              | 3             |
|  | 13               | 13             | 4             | 14               | 15             | 3             | 13               | 13             | 4             |
|  | 2                | 2              | 1             | 3                | 3              | 3             | 2                | 2              | 1             |
|  | 13               | 13             | 4             | 7                | 6              | 1             | 13               | 13             | 4             |
|  | 1                | 1              | 1             | 9                | 9              | 8             | 1                | 1              | 1             |
|  | 7                | 6              | 6             | 1                | 1              | 7             | 7                | 6              | 6             |
|  | 6                | 6              | 6             | 11               | 12             | 4             | 6                | 6              | 6             |
|  | 9                | 9              | 5             | 6                | 7              | 3             |                  |                |               |
|  | 12               | 13             | 7             |                  |                |               |                  |                |               |
|  | 6                | 8              | 4             |                  |                |               |                  |                |               |
|  | 7                | 8              | 0             |                  |                |               |                  |                |               |
|  | 14               | 15             | 3             |                  |                |               |                  |                |               |
|  | 3                | 3              | 3             |                  |                |               |                  |                |               |
|  | 7                | 6              | 1             |                  |                |               |                  |                |               |
|  | 9                | 9              | 8             |                  |                |               |                  |                |               |
|  | 1                | 1              | 7             |                  |                |               |                  |                |               |
|  | 11               | 12             | 4             |                  |                |               |                  |                |               |
|  | 6                | 7              | 3             |                  |                |               |                  |                |               |

Variables (ICU group)

Table S6: SAPS (points)

|  | All              |                |               | Survivors        |                |               | Non-survivors    |                |               |
|--|------------------|----------------|---------------|------------------|----------------|---------------|------------------|----------------|---------------|
|  | <i>PCTbefore</i> | <i>PCTpeak</i> | <i>PCTlow</i> | <i>PCTbefore</i> | <i>PCTpeak</i> | <i>PCTlow</i> | <i>PCTbefore</i> | <i>PCTpeak</i> | <i>PCTlow</i> |
|  | 38               | 44             | 26            | 38               | 44             | 26            | 9                | 13             | 46            |
|  | 54               | 44             | 41            | 54               | 44             | 41            | 50               | 42             | 22            |
|  | 37               | 30             | 27            | 37               | 30             | 27            | 59               | 60             | 38            |
|  | 48               | 43             | 33            | 48               | 43             | 33            | 66               | 60             | 61            |
|  | 36               | 32             | 36            | 36               | 32             | 36            | 49               | 52             | 52            |
|  | 37               | 42             | 42            | 37               | 42             | 42            | 5                | 5              | 38            |
|  | 48               | 49             | 45            | 48               | 49             | 45            | 54               | 57             | 48            |
|  | 43               | 43             | 42            | 43               | 43             | 42            | 48               | 44             | 38            |
|  | 49               | 53             | 48            | 49               | 53             | 48            | 48               | 48             | 57            |
|  | 49               | 45             | 34            | 49               | 45             | 34            | 35               | 35             | 40            |
|  | 9                | 13             | 46            |                  |                |               |                  |                |               |
|  | 50               | 42             | 22            |                  |                |               |                  |                |               |
|  | 59               | 60             | 38            |                  |                |               |                  |                |               |
|  | 66               | 60             | 61            |                  |                |               |                  |                |               |
|  | 49               | 52             | 52            |                  |                |               |                  |                |               |
|  | 5                | 5              | 38            |                  |                |               |                  |                |               |
|  | 54               | 57             | 48            |                  |                |               |                  |                |               |
|  | 48               | 44             | 38            |                  |                |               |                  |                |               |
|  | 48               | 48             | 57            |                  |                |               |                  |                |               |
|  | 35               | 35             | 40            |                  |                |               |                  |                |               |

Variables (ICU group)

Table S7: TISS (points)

|  | All              |                |               |    | Survivors        |                |               |    | Non-survivors    |                |               |
|--|------------------|----------------|---------------|----|------------------|----------------|---------------|----|------------------|----------------|---------------|
|  | <i>PCTbefore</i> | <i>PCTpeak</i> | <i>PCTlow</i> |    | <i>PCTbefore</i> | <i>PCTpeak</i> | <i>PCTlow</i> |    | <i>PCTbefore</i> | <i>PCTpeak</i> | <i>PCTlow</i> |
|  | 18               | 10             | 5             | 18 | 10               | 5              | 17            | 25 | 32               |                |               |
|  | 23               | 22             | 18            | 23 | 22               | 18             | 30            | 21 | 21               |                |               |
|  | 22               | 18             | 16            | 22 | 18               | 16             | 21            | 18 | 0                |                |               |
|  | 23               | 26             | 26            | 23 | 26               | 26             | 13            | 21 | 31               |                |               |
|  | 17               | 18             | 15            | 17 | 18               | 15             | 18            | 8  | 8                |                |               |
|  | 20               | 15             | 13            | 20 | 15               | 13             | 8             | 8  | 0                |                |               |
|  | 27               | 18             | 10            | 27 | 18               | 10             | 31            | 23 | 18               |                |               |
|  | 9                | 15             | 5             | 9  | 15               | 5              | 15            | 5  | 0                |                |               |
|  | 21               | 21             | 23            | 21 | 21               | 23             | 23            | 15 | 24               |                |               |
|  | 24               | 27             | 18            | 24 | 27               | 18             | 31            | 27 | 18               |                |               |
|  | 17               | 25             | 32            |    |                  |                |               |    |                  |                |               |
|  | 30               | 21             | 21            |    |                  |                |               |    |                  |                |               |
|  | 21               | 18             | 0             |    |                  |                |               |    |                  |                |               |
|  | 13               | 21             | 31            |    |                  |                |               |    |                  |                |               |
|  | 18               | 8              | 8             |    |                  |                |               |    |                  |                |               |
|  | 8                | 8              | 0             |    |                  |                |               |    |                  |                |               |
|  | 31               | 23             | 18            |    |                  |                |               |    |                  |                |               |
|  | 15               | 5              | 0             |    |                  |                |               |    |                  |                |               |
|  | 23               | 15             | 24            |    |                  |                |               |    |                  |                |               |
|  | 31               | 27             | 18            |    |                  |                |               |    |                  |                |               |

Variables all (ICU admission)

**Table S8: ICU admission**

| <i>Patient number</i> | <i>ASM</i> | <i>PCT</i> | <i>CRP</i> | <i>Lactate</i> | <i>mSOFA</i> | <i>SAPS II</i> | <i>TISS</i> |
|-----------------------|------------|------------|------------|----------------|--------------|----------------|-------------|
| 1                     | 2031       | 29,39      | 446        | 1,6            | 9            | 63             | 28          |
| 2                     | 2289       | 2,5        | 34,9       | 4              | 9            | 56             | 24          |
| 3                     | 1466       | 1,1        | 120,9      | 0,5            | 4            | 16             | 0           |
| 4                     | 1897       | 3,21       | 17,2       | 1,7            | 5            | 36             | 23          |
| 5                     | 6238       | 2,92       | 59,4       | 1,1            | 3            | 34             | 4           |
| 6                     | 2101       | 10,46      | 36,8       | 1,1            | 7            | 41             | 14          |
| 7                     | 4060       | 10,14      | 388,8      | 1,2            | 9            | 63             | 32          |
| 8                     | 39,4       | 1327       | 270,8      | 1,1            | 6            | 19             | 0           |
| 9                     | 2593       | 0,95       | 130,1      | 0,9            | 2            | 46             | 19          |
| 10                    | 4804       | 1,03       | 52,9       | 2,3            | 4            | 51             | 27          |
| 11                    | 7199       | 248,73     | 314,3      | 7,6            | 6            | 62             | 13          |
| 12                    | 5253       | 10,11      | 400        | 1,7            | 8            | 45             | 31          |
| 13                    | 2071       | 1,26       | 36,6       | 3              | 7            | 61             | 22          |
| 14                    | 3042       | 185,6      | 333,3      | 2,2            | 9            | 50             | 24          |
| 15                    | 2464       | 0,3        | 35,7       | 0,9            | 9            | 46             | 28          |
| 16                    | 2701       | 6,83       | 274,7      | 1,7            | 5            | 33             | 17          |
| 17                    | 2404       | 2,87       | 7,4        | 1,7            | 8            | 53             | 15          |
| 18                    | 2903       | 3,72       | 274,4      | 2,5            | 1            | 46             | 19          |
| 19                    | 1690       | 4,61       | 24,5       | 10             | 4            | 83             | 24          |
| 20                    | n/a        | 3,14       | 34         | 2,1            | 6            | 16             | 19          |
| 21                    | 5241       | 8,15       | 12,2       | 2,5            | 10           | 59             | 22          |
| 22                    | 1871       | 1,19       | 168,8      | 0,8            | 4            | 36             | 10          |
| 23                    | 2321       | 25,67      | 346,6      | 1,3            | 6            | 49             | 15          |
| 24                    | 1532       | 3,79       | 118,3      | 2,1            | 12           | 53             | 10          |
| 25                    | 5984       | 12,75      | 297,1      | 1,8            | 8            | 72             | 19          |
| 26                    | 2755       | 4,39       | 9,7        | 0,6            | 4            | 17             | 10          |
| 27                    | 1171       | 0,59       | 2,8        | 6,2            | 4            | 38             | 14          |
| 28                    | 5569       | 4,88       | 5,6        | 12,7           | 6            | 75             | 44          |
| 29                    | 2021       | 0,75       | 171,8      | 0,7            | 7            | 57             | 13          |
| 30                    | 2307       | 0,37       | 201        | 2,7            | 7            | 38             | 10          |
| 31                    | 5735       | 5,81       | 46,6       | 2,6            | 9            | 47             | 36          |
| 32                    | 2149       | 0,37       | 239,7      | 0,7            | 8            | 52             | 19          |
| 33                    | 4396       | 3,19       | 88,9       | 1,4            | 8            | 34             | 14          |



Variables all (ICU admission)

|    |      |      |       |     |    |    |    |
|----|------|------|-------|-----|----|----|----|
| 34 | 2965 | 0,14 | 6,6   | 2,8 | 2  | 34 | 14 |
| 35 | 3119 | 2,68 | 62,6  | 0,7 | 8  | 66 | 35 |
| 36 | 5010 | 1,01 | 234,5 | 1,3 | 7  | 25 | 19 |
| 37 | 1704 | 0,9  | 152,7 | 1,6 | 6  | 33 | 19 |
| 38 | 2908 | 1,57 | 325,6 | 0,9 | 10 | 41 | 20 |
| 39 | 2885 | 2,18 | 12,4  | 2,1 | 4  | 46 | 10 |
| 40 | 1897 | 5,8  | 155,9 | 0,8 | 6  | 57 | 10 |

Characteristics + Outcome (all)

Table S9: All Patients

| Patient (no.) | Age (years) | Gender | Outcome    | Reason for ICU admission |
|---------------|-------------|--------|------------|--------------------------|
| 1             | 72          | female | death      | Ileus                    |
| 2             | 86          | male   | death      | Thoracic surgery         |
| 3             | 77          | male   | discharged | Major trauma             |
| 4             | 73          | male   | discharged | Pneumonia                |
| 5             | 52          | male   | death      | Thoracic surgery         |
| 6             | 64          | male   | death      | Pankreatitis             |
| 7             | 25          | male   | discharged | Pneumonia                |
| 8             | 73          | female | discharged | Thoracic surgery         |
| 9             | 40          | male   | discharged | Pneumonia                |
| 10            | 50          | female | discharged | Abdominal surgery        |
| 11            | 83          | male   | death      | Major trauma             |
| 12            | 27          | female | discharged | Abdominal surgery        |
| 13            | 54          | female | death      | Major bleeding           |
| 14            | 69          | male   | discharged | Soft tissue infection    |
| 15            | 58          | male   | discharged | Abdominal surgery        |
| 16            | 74          | male   | discharged | Thoracic surgery         |
| 17            | 66          | male   | discharged | Thoracic surgery         |
| 18            | 72          | female | discharged | Mesenterial ischaemia    |
| 19            | 43          | male   | discharged | Major trauma             |
| 20            | 77          | male   | discharged | Thoracic surgery         |
| 21            | 69          | female | discharged | Abdominal surgery        |
| 22            | 35          | male   | discharged | Abdominal surgery        |
| 23            | 76          | female | death      | Abdominal surgery        |
| 24            | 81          | male   | death      | Mesenterial ischaemia    |
| 25            | 46          | male   | discharged | Pneumonia                |
| 26            | 73          | female | discharged | Soft tissue infection    |
| 27            | 32          | male   | death      | Liver failure            |
| 28            | 58          | male   | death      | Abdominal surgery        |
| 29            | 89          | female | death      | Abdominal surgery        |
| 30            | 80          | male   | discharged | Pneumonia                |
| 31            | 70          | female | death      | Abdominal surgery        |
| 32            | 63          | male   | discharged | Soft tissue infection    |
| 33            | 67          | male   | discharged | Abdominal surgery        |

Characteristics + Outcome (all)

|    |    |        |            |                   |
|----|----|--------|------------|-------------------|
| 34 | 71 | female | discharged | Pancreatitis      |
| 35 | 77 | female | death      | Abdominal surgery |
| 36 | 44 | male   | discharged | Abdominal surgery |
| 37 | 88 | male   | discharged | Pneumonia         |
| 38 | 57 | male   | death      | Abdominal surgery |
| 39 | 82 | female | death      | Major bleeding    |
| 40 | 68 | male   | discharged | Thoracic surgery  |

**Table S10: ICU patients with SIRS plus PCT peak**

| Patient (no.) | Age (years) | Gender | Outcome    | Reason for ICU admission |
|---------------|-------------|--------|------------|--------------------------|
| 23            | 76          | female | death      | Abdominal surgery        |
| 28            | 58          | male   | death      | Abdominal surgery        |
| 31            | 70          | female | death      | Abdominal surgery        |
| 35            | 77          | female | death      | Abdominal surgery        |
| 27            | 32          | male   | death      | Liver failure            |
| 11            | 83          | male   | death      | Major trauma             |
| 6             | 64          | male   | death      | Pancreatitis             |
| 2             | 86          | male   | death      | Thoracic surgery         |
| 5             | 52          | male   | death      | Thoracic surgery         |
| 10            | 50          | female | discharged | Abdominal surgery        |
| 21            | 69          | female | discharged | Abdominal surgery        |
| 33            | 67          | male   | discharged | Abdominal surgery        |
| 36            | 44          | male   | discharged | Abdominal surgery        |
| 34            | 71          | female | discharged | Pancreatitis             |
| 25            | 46          | male   | discharged | Pneumonia                |
| 37            | 88          | male   | discharged | Pneumonia                |
| 8             | 73          | female | discharged | Thoracic surgery         |
| 17            | 66          | male   | discharged | Thoracic surgery         |
| 20            | 77          | male   | discharged | Thoracic surgery         |

**Table S11: ICU patients without SIRS plus PCT peak**

| Patient (no.) | Age (years) | Gender | Outcome    | Reason for ICU admission |
|---------------|-------------|--------|------------|--------------------------|
| 12            | 27          | female | discharged | Abdominal surgery        |
| 15            | 58          | male   | discharged | Abdominal surgery        |
| 22            | 35          | male   | discharged | Abdominal surgery        |

Characteristics + Outcome (all)

|    |    |        |            |                       |
|----|----|--------|------------|-----------------------|
| 29 | 89 | female | death      | Abdominal surgery     |
| 38 | 57 | male   | death      | Abdominal surgery     |
| 1  | 72 | female | death      | Ileus                 |
| 13 | 54 | female | death      | Major bleeding        |
| 39 | 82 | female | death      | Major bleeding        |
| 3  | 77 | male   | discharged | Major trauma          |
| 19 | 43 | male   | discharged | Major trauma          |
| 18 | 72 | female | discharged | Mesenterial ischaemia |
| 24 | 81 | male   | death      | Mesenterial ischaemia |
| 4  | 73 | male   | discharged | Pneumonia             |
| 7  | 25 | male   | discharged | Pneumonia             |
| 9  | 40 | male   | discharged | Pneumonia             |
| 30 | 80 | male   | discharged | Pneumonia             |
| 14 | 69 | male   | discharged | Soft tissue infection |
| 26 | 73 | female | discharged | Soft tissue infection |
| 32 | 63 | male   | discharged | Soft tissue infection |
| 16 | 74 | male   | discharged | Thoracic surgery      |
| 40 | 68 | male   | discharged | Thoracic surgery      |

Table S12: Control group

| Patient (no.) | Age (years) | Gender | Outcome    | Reason for ICU admission |
|---------------|-------------|--------|------------|--------------------------|
| 1             | 62          | female | discharged | Abdominal surgery        |
| 2             | 71          | female | discharged | Abdominal surgery        |
| 3             | 69          | male   | discharged | Abdominal surgery        |
| 4             | 69          | male   | discharged | Abdominal surgery        |
| 5             | 58          | male   | discharged | Abdominal surgery        |
| 6             | 92          | female | discharged | Abdominal surgery        |
| 7             | 58          | male   | discharged | Abdominal surgery        |
| 8             | 46          | male   | discharged | Abdominal surgery        |
